# Supplementary material for: Dietary Supplement Use Differs by Socioeconomic and Health-Related Characteristics among U.S. Adults, NHANES 2011–2014
Source: PubMed Central journal article supplement (PMC6116059; doi:10.3390/nu10081114), 2018-08-17
Supplement: nutrients-10-01114-s001.pdf [file nutrients-10-01114-s001.pdf]

Table S1. Estimated prevalence (%) of dietary supplement use by of type of dietary supplement and selected poverty indicators among U.S. Adult supplement users, 2011-2014<sup>1,2</sup>

|                    | Total<br>(n=5,375) | PIR                     |                           |                         | Food security            |                          | SNAP                           |                                              |                                                  |
|--------------------|--------------------|-------------------------|---------------------------|-------------------------|--------------------------|--------------------------|--------------------------------|----------------------------------------------|--------------------------------------------------|
|                    |                    | PIR≤130%<br>(n=1,438)   | 131-350%<br>(n=1,678)     | ≥350%<br>(n=1,867)      | Food-insecure<br>(n=769) | Food-secure<br>(n=4,573) | SNAP<br>Participant<br>(n=755) | Income-eligible<br>nonparticipant<br>(n=913) | Income-ineligible<br>nonparticipant<br>(n=3,358) |
| <b>Type</b>        |                    |                         |                           |                         |                          |                          |                                |                                              |                                                  |
| <b>Calcium</b>     | 70.7 (1.0)         | 63.2 (2.5) <sup>a</sup> | 70.6 (1.7) <sup>a,b</sup> | 73.8 (1.1) <sup>b</sup> | 62.8 (2.9) <sup>a</sup>  | 71.7 (1.0) <sup>b</sup>  | 61.4 (2.9) <sup>a</sup>        | 64.3 (2.3) <sup>a</sup>                      | 73.0 (1.0) <sup>b</sup>                          |
| <b>Iron</b>        | 32.6 (1.1)         | 34.9 (1.8)              | 32.4 (1.5)                | 32.0 (1.6)              | 34.8 (2.4)               | 32.3 (1.1)               | 30.9 (2.9)                     | 35.5 (1.8)                                   | 32.4 (1.3)                                       |
| <b>Zinc</b>        | 57.8 (1.0)         | 51.1 (2.1) <sup>a</sup> | 57.1 (1.8) <sup>b</sup>   | 61.1 (1.5) <sup>b</sup> | 49.2 (3.3) <sup>a</sup>  | 58.9 (1.0) <sup>b</sup>  | 48.0 (2.9) <sup>a</sup>        | 54.0 (2.3) <sup>a,b</sup>                    | 59.9 (1.1) <sup>b</sup>                          |
| <b>Magnesium</b>   | 56.0 (1.0)         | 47.4 (2.0) <sup>a</sup> | 54.7 (1.7) <sup>b</sup>   | 60.4 (1.5) <sup>b</sup> | 48.3 (2.6) <sup>a</sup>  | 57.0 (0.9) <sup>b</sup>  | 44.8 (2.7) <sup>a</sup>        | 49.9 (2.5) <sup>a</sup>                      | 58.6 (1.0) <sup>b</sup>                          |
| <b>Selenium</b>    | 50.1 (0.9)         | 41.6 (2.0) <sup>a</sup> | 49.4 (1.6) <sup>b</sup>   | 54.1 (1.3) <sup>b</sup> | 40.7 (3.1) <sup>a</sup>  | 51.4 (0.9) <sup>b</sup>  | 38.5 (2.5) <sup>a</sup>        | 44.8 (2.3) <sup>a</sup>                      | 52.6 (1.0) <sup>b</sup>                          |
| <b>Folate</b>      | 61.3 (0.9)         | 53.5 (2.1) <sup>a</sup> | 58.5 (1.6) <sup>a</sup>   | 66.6 (1.3) <sup>b</sup> | 52.6 (2.9) <sup>a</sup>  | 62.5 (0.8) <sup>b</sup>  | 50.7 (2.7) <sup>a</sup>        | 56.0 (2.0) <sup>a</sup>                      | 63.8 (0.9) <sup>b</sup>                          |
| <b>Vitamin D</b>   | 75.5 (0.8)         | 65.7 (2.0) <sup>a</sup> | 72.8 (1.3) <sup>b</sup>   | 81.2 (1.4) <sup>c</sup> | 64.2 (1.9) <sup>a</sup>  | 76.8 (0.8) <sup>b</sup>  | 66.0 (2.5) <sup>a</sup>        | 67.0 (2.2) <sup>a</sup>                      | 78.1 (0.9) <sup>b</sup>                          |
| <b>Vitamin C</b>   | 69.4 (0.9)         | 61.9 (2.1) <sup>a</sup> | 69.8 (1.5) <sup>b</sup>   | 72.7 (1.2) <sup>b</sup> | 61.2 (3.4) <sup>a</sup>  | 70.4 (0.8) <sup>b</sup>  | 57.0 (2.8) <sup>a</sup>        | 65.9 (2.1) <sup>b</sup>                      | 71.9 (1.0) <sup>c</sup>                          |
| <b>Vitamin B12</b> | 66.1 (0.8)         | 60.1 (1.9) <sup>a</sup> | 64.4 (1.7) <sup>a</sup>   | 70.1 (1.2) <sup>b</sup> | 58.1 (2.7) <sup>a</sup>  | 67.1 (0.9) <sup>b</sup>  | 56.9 (2.3) <sup>a</sup>        | 62.9 (2.1) <sup>a,b</sup>                    | 68.2 (1.0) <sup>b</sup>                          |
| <b>Vitamin B6</b>  | 62.0 (0.9)         | 55.2 (2.2) <sup>a</sup> | 60.2 (1.6) <sup>a</sup>   | 66.2 (1.3) <sup>b</sup> | 53.5 (2.9) <sup>a</sup>  | 63.2 (0.9) <sup>b</sup>  | 54.2 (2.8) <sup>a</sup>        | 57.3 (2.1) <sup>a</sup>                      | 64.1 (1.0) <sup>b</sup>                          |
| <b>Vitamin K</b>   | 45.4 (1.0)         | 38.5 (1.9) <sup>a</sup> | 44.6 (1.5) <sup>b</sup>   | 48.7 (1.5) <sup>b</sup> | 37.8 (3.1) <sup>a</sup>  | 46.4 (1.1) <sup>b</sup>  | 35.1 (2.3) <sup>a</sup>        | 41.4 (2.3) <sup>a</sup>                      | 47.5 (1.2) <sup>b</sup>                          |

Abbreviations: PIR, poverty-income ratio; SNAP, Supplemental Nutrition Assistance Program.

<sup>1</sup> Different superscript letters (a,b,c) indicate significant differences within a row at a Bonferroni corrected  $p < 0.0167$ , determined by using a univariate t statistic. Missing superscripts indicate that the difference between groups within a category was not statistically significant.

<sup>2</sup> Data are presented as percentages (SE); sample size is 5375 unless otherwise noted.

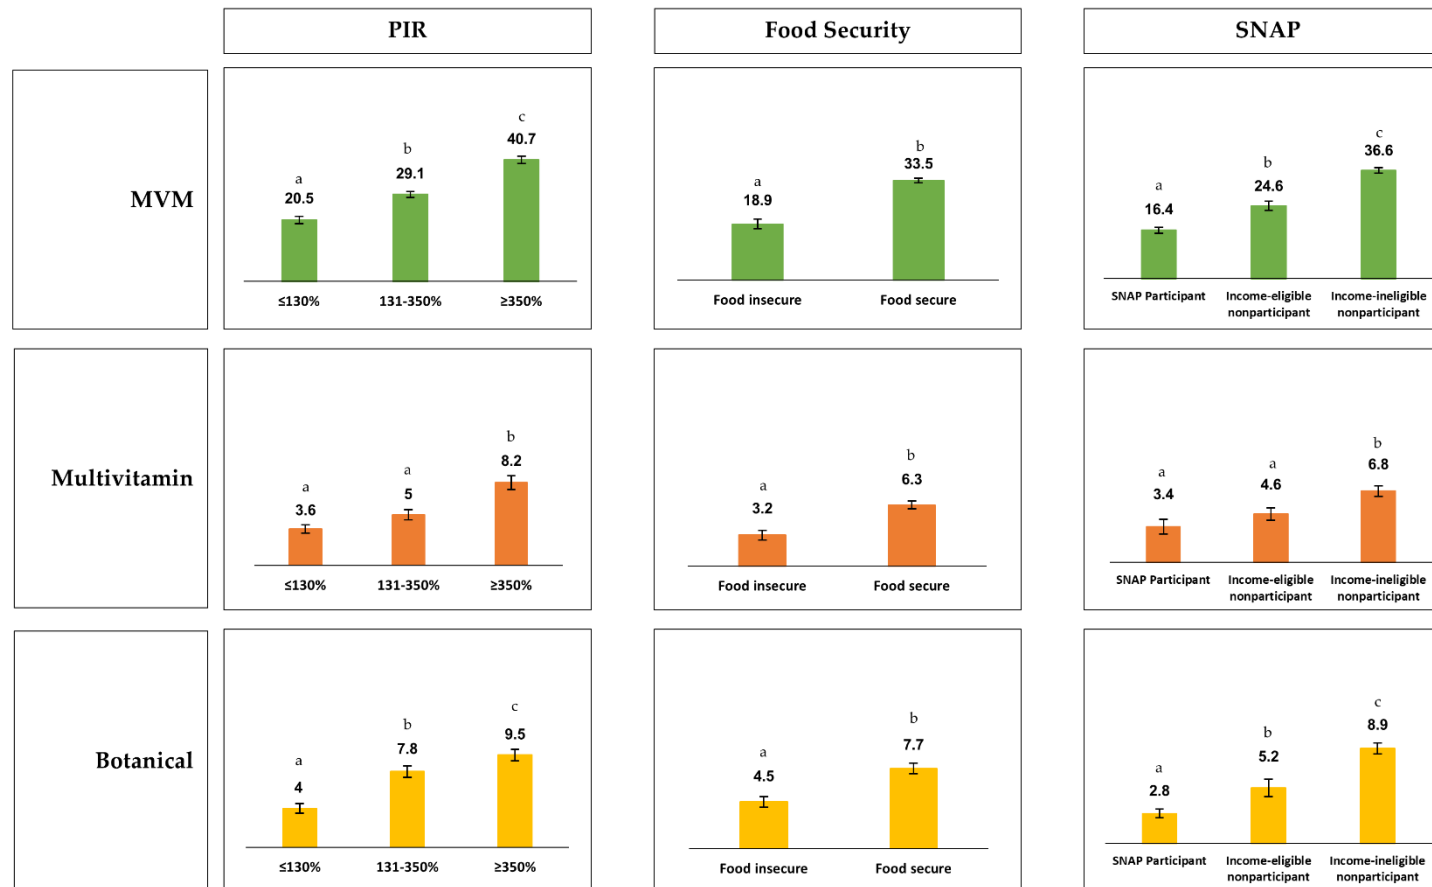

**Figure S1. Estimated prevalence (%) of MVM, multivitamin, and botanical use by selected poverty indicators among U.S. Adults, 2011-2014<sup>1,2</sup>**

Abbreviations: MVM, multivitamin-minerals; PIR, poverty-income ratio; SNAP, Supplemental Nutrition Assistance Program.

<sup>1</sup> Different superscript letters (a,b,c) indicate significant differences within a row at a Bonferroni corrected  $p < 0.0167$ , determined by using a univariate t statistic.

<sup>2</sup> Data are presented as percentages (SE); sample size is 11 024 unless otherwise noted.
